# Supplementary material
Source: PubMed Central journal article supplement (PMC10224587)
Supplement: NIHMS1901639-supplement-Supplementary_Material.pdf [file NIHMS1901639-supplement-Supplementary_Material.pdf]

# Supporting Information

## **Ultrabright Pdots with a large absorbance cross section and high quantum yield**

*Jicheng Zhang, Jiangbo Yu, Yifei Jiang and Daniel T. Chiu\**

Departments of Chemistry and Bioengineering, University of Washington, Seattle, WA 98195

**Corresponding Author**

\*D. T. Chiu - E-mail: [chiu@uw.edu](mailto:chiu@uw.edu)

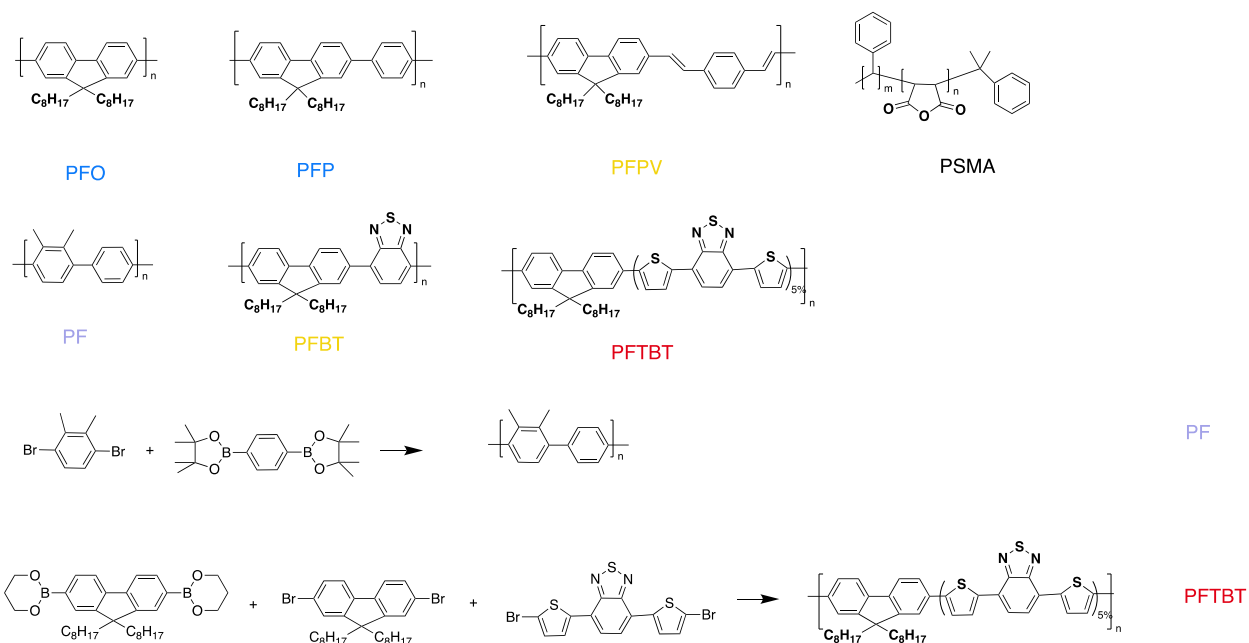

**Scheme S1.** Polymer structures, and synthesis of PF and PFTBT.

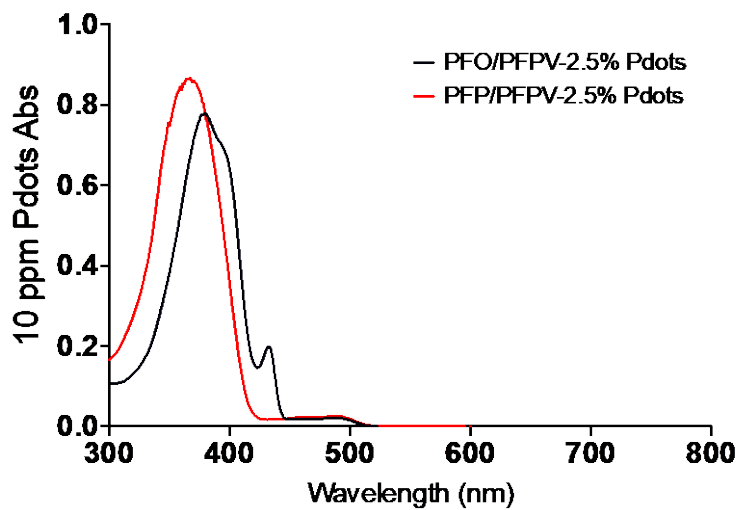

**Figure S1.** Absorption spectra of 10 ppm PFO/PFPV and PFP/PFPV Pdots (2.5 mol% PFPV).

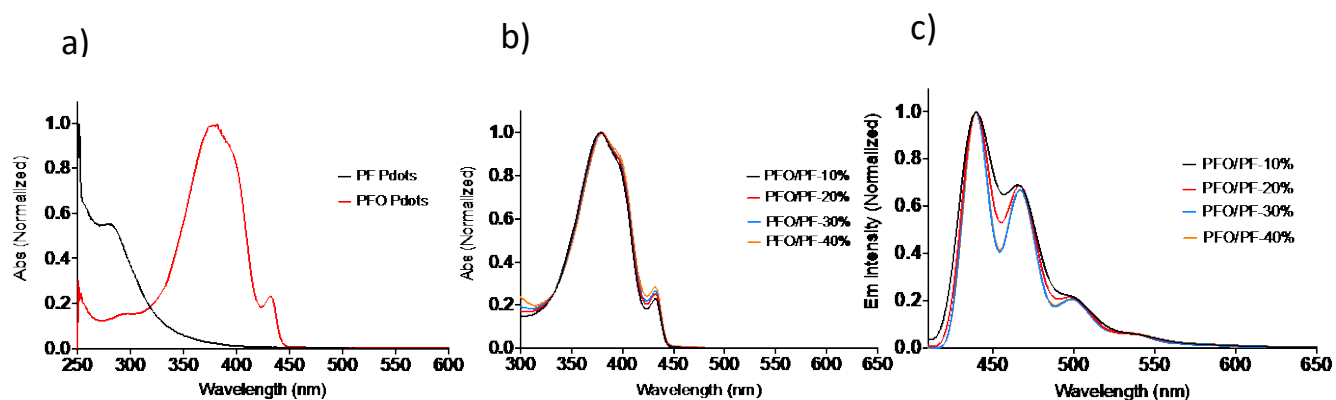

**Figure S2.** (a) Absorption spectra of PF and PFO Pdots. (b) Absorption and (c) emission spectra of PFO/PF Pdots at different PF concentrations.

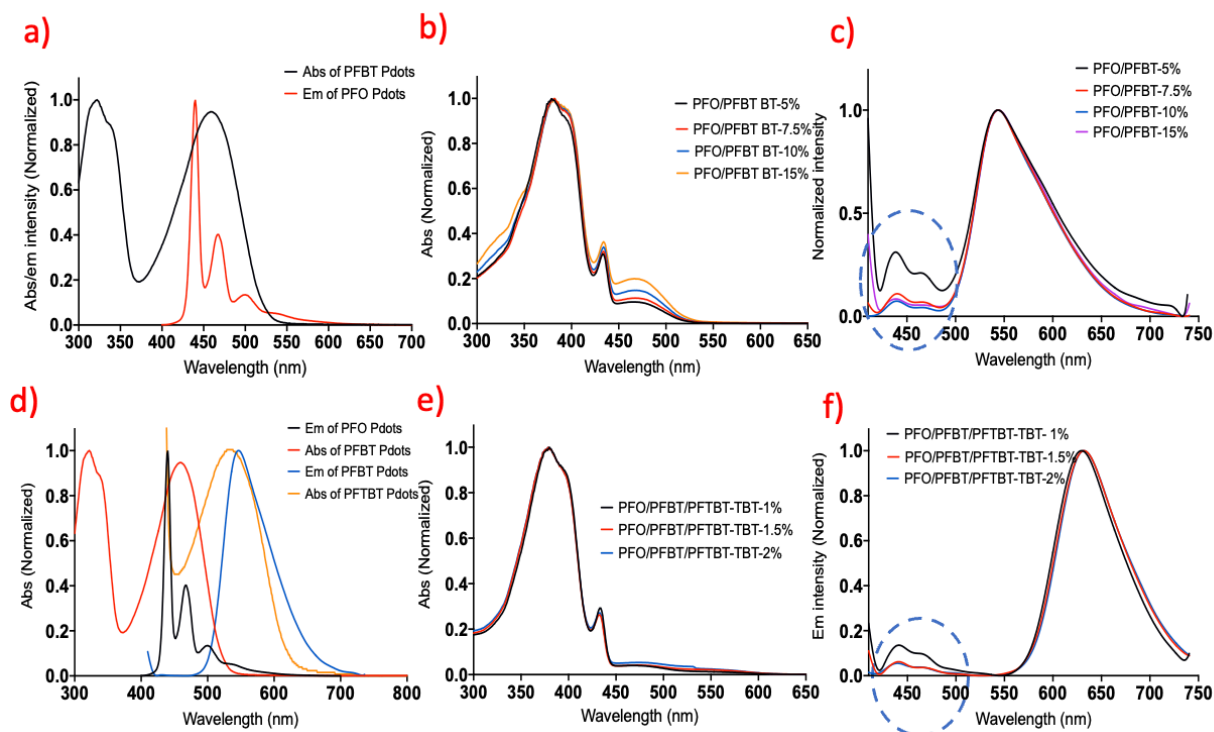

**Figure S3.** (a) Overlap of PFO Pdot emission and PFBT Pdot absorbance spectra. (b) Absorbance and (c) emission spectra of PFO/PFBT Pdots at different PFBT concentrations. (d) Overlap of PFO

emission and PFBT (A<sub>1</sub>) absorbance spectra, and overlap of PFBT emission and PFTBT (A<sub>2</sub>) absorbance spectra, normalized to the PFTBT absorption peak. (e) Absorbance and (f) emission spectra of PFO/PFBT Pdots at different PFTBT concentrations.

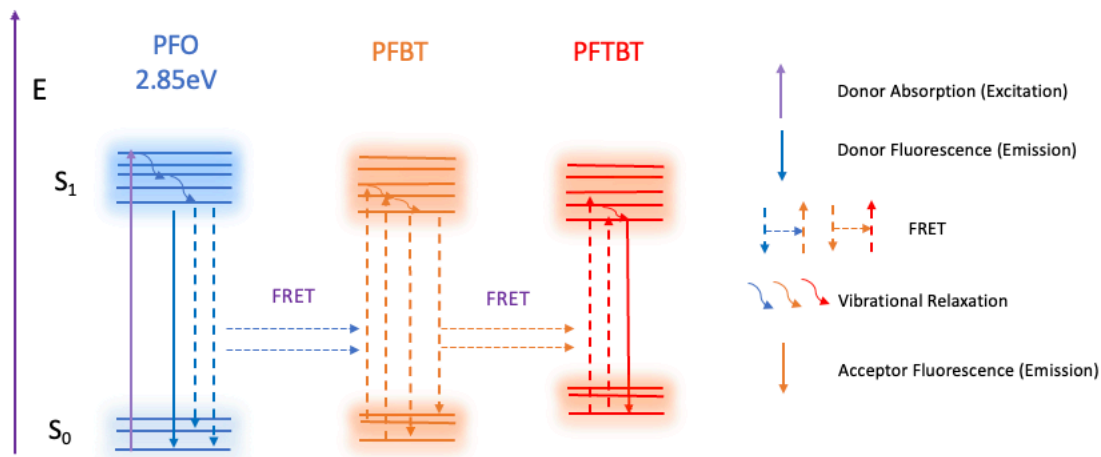

**Figure S4.** Jablonski diagram illustrating the mechanism of FRET in PFO/PFBT/PFTBT Pdots.

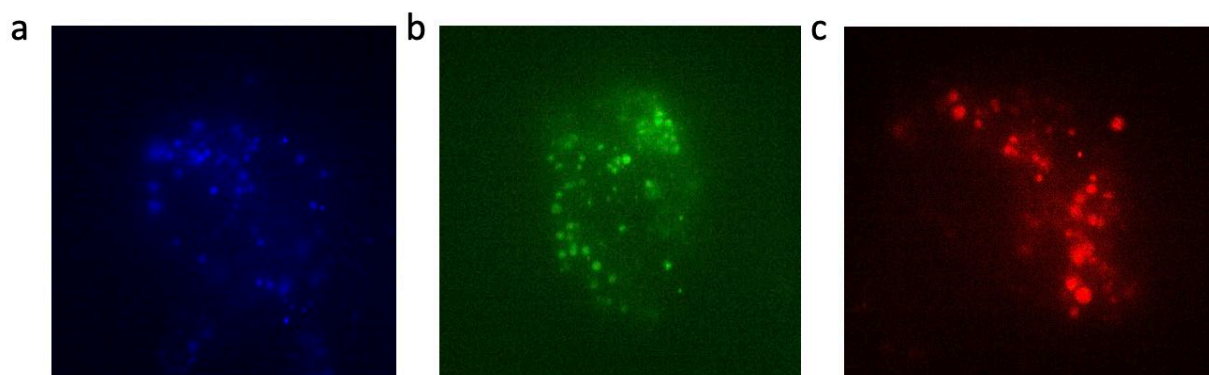

**Figure S5.** Fluorescence images of BS-C-1 cells labeled with PFP/PFPV-2.5 mol%, PFO/PFBT-BT-7.5 mol%, and PFO/PFBT/PFTBT-TBT-1.5 mol% Pdots, respectively.
